# Supplementary material
Source: publisher site journal article supplement (https://www.spandidos-publications.com/4873/downloadSupplementary)
Supplement: Supplementary file 1 [file downloadSupplementary]

## Sheet: Sheet 1
Table SI. Differentially enriched terms by GSEA analysis
ID	Description	setSize	enrichmentScore	NES	pvalue	p.adjust	qvalues	rank	leading_edge	core_enrichment
NABA_MATRISOME	NABA_MATRISOME	296	0.216433	1.56035	0.0096463	0.0687299	0.0554239	750	tags=41%, list=32%, signal=32%	COL26A1/COL2A1/SERPINB2/FGF3/FGF19/SHH/SFRP5/BMP5/COL9A3/MUC6/ADIPOQ/ANGPTL7/COL9A1/MATN4/COL11A2/PI3/WIF1/CST1/WNT4/FGF8/SLPI/CXCL14/LGI1/ELFN2/COL25A1/BMP7/CHAD/RSPO4/COMP/CILP2/CST2/BRINP3/CPAMD8/CXCL6/FGF9/COL23A1/REG3G/PRG4/KERA/TNXB/CXCL1/VWA5B1/REG1A/VWDE/BMP8B/MUCL1/MEGF11/THBS4/MMP27/TGM5/SERPINB11/MUC5AC/FGFBP1/NELL1/C1QL2/TGM3/CLEC3B/ELANE/COLEC11/SERPINB10/TGFA/WNT10B/WNT1/CLEC4G/MATN…
REACTOME_DEVELOPMENTAL_BIOLOGY	REACTOME_DEVELOPMENTAL_BIOLOGY	160	0.317876	2.10776	0.00113895	0.0231331	0.0186546	659	tags=44%, list=28%, signal=34%	SPRR2B/KCNQ2/COL2A1/KRT77/SPRR2A/COL9A3/SPRR2F/ADIPOQ/COL9A1/LHX3/SPRR2D/PI3/SPRR2E/MAG/SCN7A/KRT74/MAFA/ZIC3/CHL1/CTNNA2/LGI1/KRT31/SPRR2G/CACNA1I/KRT34/GAP43/PDX1/KRT85/NR5A1/KRT27/DKK1/KRT25/TUBB4A/CDX2/MYOD1/FOXA2/EFNA2/TGM5/KRT71/KRT82/KRT83/EPHA8/KRT15/KRT24/WNT10B/CNTN2/WNT1/DSG3/GFRA3/PCSK6/TUBA3C/NCAN/COL6A6/KRT2/SLIT1/KLK8/PKP2/GFRA2/LAMA2/KRT84/NRCAM/DSG1/SCN10A/LGI3/KLK13/PTF1A/CD36/H…
REACTOME_GPCR_LIGAND_BINDING	REACTOME_GPCR_LIGAND_BINDING	130	0.271174	1.73524	0.00348432	0.0395421	0.0318869	581	tags=37%, list=25%, signal=29%	EDN3/SHH/GRM4/CRHR1/PLPPR5/NPW/CRH/PLPPR3/FZD10/TAC3/TRH/WNT4/GPHA2/UTS2R/HRH3/PDYN/TAC1/CXCL6/OXT/GAL/CXCL1/PROK2/GNGT1/MTNR1A/GCG/F2RL2/CASR/SSTR5/SSTR4/KISS1/WNT10B/WNT1/SST/MLN/WNT3A/WNT11/CXCL8/WNT2B/RGR/C3/FZD9/GRM3/WNT2/OPRD1/WNT6/PLPPR1/NPY/CCL20
NABA_SECRETED_FACTORS	NABA_SECRETED_FACTORS	110	0.229892	1.43885	0.0526946	0.217127	0.175092	872	tags=49%, list=38%, signal=32%	FGF3/FGF19/SHH/SFRP5/BMP5/ANGPTL7/WIF1/WNT4/FGF8/CXCL14/BMP7/BRINP3/CXCL6/FGF9/CXCL1/BMP8B/MEGF11/FGFBP1/TGFA/WNT10B/WNT1/CSF3/WNT3A/GH1/WNT11/CXCL8/WNT2B/WNT2/PDGFD/BMP3/VEGFD/WNT6/CRLF1/CCL20/EGFL6/CCL22/NTF4/SFRP2/FGF20/CCL25/ISM1/GDF7/CBLN2/TPO/FGFBP2/CCL11/BMP4/CBLN4/S100A8/INSL3/BMP6/IGF2/S100P/CRHBP
NABA_CORE_MATRISOME	NABA_CORE_MATRISOME	86	0.291254	1.74142	0.00732601	0.0626374	0.0505109	719	tags=47%, list=31%, signal=33%	COL26A1/COL2A1/COL9A3/ADIPOQ/COL9A1/MATN4/COL11A2/LGI1/COL25A1/CHAD/RSPO4/COMP/CILP2/COL23A1/PRG4/KERA/TNXB/VWA5B1/VWDE/THBS4/NELL1/MATN3/FBLN2/OIT3/SPON1/IGFBP2/NCAN/COL6A6/SLIT1/LAMA2/IGFBP6/ELN/LGI3/LRG1/VIT/FNDC1/SVEP1/EPYC/IBSP/PCOLCE2
REACTOME_PEPTIDE_LIGAND_BINDING_RECEPTORS	REACTOME_PEPTIDE_LIGAND_BINDING_RECEPTORS	63	0.294498	1.64606	0.0203822	0.120184	0.096917	709	tags=46%, list=31%, signal=33%	EDN3/NPW/TAC3/TRH/UTS2R/PDYN/TAC1/CXCL6/OXT/GAL/CXCL1/PROK2/F2RL2/SSTR5/SSTR4/KISS1/SST/MLN/CXCL8/C3/OPRD1/NPY/CCL20/CCL22/AVP/NTSR1/NTSR2/NPY5R/CCL25
WP_PI3KAKT_SIGNALING_PATHWAY	WP_PI3KAKT_SIGNALING_PATHWAY	63	0.259245	1.44901	0.0687898	0.247643	0.1997	739	tags=44%, list=32%, signal=31%	COL2A1/FGF3/FGF19/COL9A3/COL9A1/FGF8/CHAD/COMP/FGF9/TNXB/THBS4/GNGT1/EFNA2/NGFR/TGFA/CSF3/GH1/COL6A6/PDGFD/LAMA2/VEGFD/ITGB4/NTF4/IL2RA/FGF20/IBSP/FGFR3/CCND2
REACTOME_MUSCLE_CONTRACTION	REACTOME_MUSCLE_CONTRACTION	58	-0.411971	-2.81679	0.0042735	0.0429864	0.0346643	448	tags=53%, list=19%, signal=44%	CACNA1C/CACNB2/CAMK2A/KCND3/SLC8A1/ATP2B2/RYR3/DMD/TPM1/ACTC1/TPM2/DES/ATP2A1/MYL9/ACTA2/RYR2/SCN3A/ITPR1/KCNK3/KCNH2/SORBS1/TMOD1/ACTG2/CASQ1/CASQ2/PLN/MYLK/LMOD1/MYH11/TRDN/ACTA1
NABA_ECM_GLYCOPROTEINS	NABA_ECM_GLYCOPROTEINS	57	0.270513	1.46302	0.0667539	0.246991	0.199174	968	tags=61%, list=42%, signal=37%	ADIPOQ/MATN4/LGI1/RSPO4/COMP/CILP2/TNXB/VWA5B1/VWDE/THBS4/NELL1/MATN3/FBLN2/OIT3/SPON1/IGFBP2/SLIT1/LAMA2/IGFBP6/ELN/LGI3/LRG1/VIT/FNDC1/SVEP1/IBSP/PCOLCE2/NTN4/NTNG2/NTN5/FGL1/VWA2/CILP/EMILIN2/FBN1
WP_FOCAL_ADHESIONPI3KAKTMTORSIGNALING_PATHWAY	WP_FOCAL_ADHESIONPI3KAKTMTORSIGNALING_PATHWAY	55	0.273306	1.45479	0.0720839	0.253584	0.20449	311	tags=25%, list=13%, signal=23%	COL2A1/FGF3/FGF19/COL11A2/FGF8/NOS1/CHAD/COMP/FGF9/TNXB/THBS4/GNGT1/EFNA2/NGFR
KEGG_PATHWAYS_IN_CANCER	KEGG_PATHWAYS_IN_CANCER	46	0.376703	1.92332	0.004	0.0414545	0.033429	566	tags=46%, list=24%, signal=35%	FGF3/FGF19/SHH/FZD10/WNT4/FGF8/CTNNA2/FGF9/CBLC/TGFA/WNT10B/WNT1/WNT3A/WNT11/CXCL8/WNT2B/FZD9/WNT2/LAMA2/VEGFD/WNT6
REACTOME_ION_CHANNEL_TRANSPORT	REACTOME_ION_CHANNEL_TRANSPORT	42	-0.247654	-1.52084	0.0566038	0.222511	0.179434	1609	tags=95%, list=69%, signal=30%	ATP1B2/TRPV3/SCNN1G/ASIC2/ATP4B/BEST3/ATP12A/CLCA1/ANO2/ANO4/ATP6V0A4/TTYH1/TRPC7/TRPM6/ATP10B/ATP8A2/TTYH2/UNC80/TRPV4/WNK4/UNC79/ATP7B/RIPK3/ATP2B4/TRPC4/ATP1B1/ATP8B4/SLC17A3/CAMK2A/ATP2B2/RYR3/ATP2A1/ANO3/RYR2/SLC9C2/ANO5/CASQ1/CASQ2/PLN/TRDN
REACTOME_KERATINIZATION	REACTOME_KERATINIZATION	40	0.569682	2.79664	0.00135135	0.0231331	0.0186546	672	tags=75%, list=29%, signal=54%	SPRR2B/KRT77/SPRR2A/SPRR2F/SPRR2D/PI3/SPRR2E/KRT74/KRT31/SPRR2G/KRT34/KRT85/KRT27/KRT25/TGM5/KRT71/KRT82/KRT83/KRT15/KRT24/DSG3/PCSK6/KRT2/KLK8/PKP2/KRT84/DSG1/KLK13/KRT76/KRT19
KEGG_CALCIUM_SIGNALING_PATHWAY	KEGG_CALCIUM_SIGNALING_PATHWAY	40	-0.385705	-2.30886	0.00381679	0.040792	0.0328947	606	tags=62%, list=26%, signal=47%	CACNA1H/PDE1C/PHKA1/SLC25A4/PTGER3/ADRB3/PLCB4/CACNA1C/CAMK2A/SLC8A1/ATP2B2/RYR3/HTR4/GRM1/P2RX1/ATP2A1/PHKG1/RYR2/ITPR1/GRIN2A/CHRM2/PLN/MYLK/TACR2/ADRA1A
REACTOME_FORMATION_OF_THE_CORNIFIED_ENVELOPE	REACTOME_FORMATION_OF_THE_CORNIFIED_ENVELOPE	39	0.579602	2.82429	0.0013624	0.0231331	0.0186546	672	tags=77%, list=29%, signal=56%	SPRR2B/KRT77/SPRR2A/SPRR2F/SPRR2D/PI3/SPRR2E/KRT74/KRT31/SPRR2G/KRT34/KRT85/KRT27/KRT25/TGM5/KRT71/KRT82/KRT83/KRT15/KRT24/DSG3/PCSK6/KRT2/KLK8/PKP2/KRT84/DSG1/KLK13/KRT76/KRT19
REACTOME_CARDIAC_CONDUCTION	REACTOME_CARDIAC_CONDUCTION	37	-0.300279	-1.75048	0.0188679	0.113976	0.0919101	448	tags=46%, list=19%, signal=38%	CACNA1C/CACNB2/CAMK2A/KCND3/SLC8A1/ATP2B2/RYR3/ATP2A1/RYR2/SCN3A/ITPR1/KCNK3/KCNH2/CASQ1/CASQ2/PLN/TRDN
REACTOME_DISEASES_OF_SIGNAL_TRANSDUCTION_BY_GROWTH_FACTOR_RECEPTORS_AND_SECOND_MESSENGERS	REACTOME_DISEASES_OF_SIGNAL_TRANSDUCTION_BY_GROWTH_FACTOR_RECEPTORS_AND_SECOND_MESSENGERS	37	0.299404	1.43667	0.0895522	0.288933	0.232996	381	tags=27%, list=16%, signal=23%	FGF3/FGF19/SHH/FGF8/DUSP9/ERBB3/FGF9/DKK1/HES5/TGFA
REACTOME_CLASS_B_2_SECRETIN_FAMILY_RECEPTORS_	REACTOME_CLASS_B_2_SECRETIN_FAMILY_RECEPTORS_	35	0.359944	1.71566	0.0135685	0.0875554	0.0706048	566	tags=43%, list=24%, signal=33%	SHH/CRHR1/CRH/FZD10/WNT4/GNGT1/GCG/WNT10B/WNT1/WNT3A/WNT11/WNT2B/FZD9/WNT2/WNT6
REACTOME_SIGNALING_BY_WNT	REACTOME_SIGNALING_BY_WNT	35	0.347505	1.65637	0.0189959	0.113976	0.0919101	617	tags=46%, list=27%, signal=34%	WIF1/WNT4/LGR5/TERT/RSPO4/DKK1/GNGT1/SOST/WNT10B/WNT1/WNT3A/WNT11/WNT2B/WNT2/WNT6/DKK2
WP_NEURAL_CREST_DIFFERENTIATION	WP_NEURAL_CREST_DIFFERENTIATION	34	0.400454	1.88725	0.00550964	0.0523416	0.0422084	499	tags=41%, list=21%, signal=33%	COL2A1/FGF19/PAX7/COL11A2/FGF8/MIA/BMP7/PHOX2B/HES5/WNT1/MSX2/OLIG2/WNT3A/GBX2
REACTOME_DEGRADATION_OF_THE_EXTRACELLULAR_MATRIX	REACTOME_DEGRADATION_OF_THE_EXTRACELLULAR_MATRIX	34	0.311453	1.4678	0.0798898	0.270893	0.218449	208	tags=21%, list=9%, signal=19%	COL26A1/COL2A1/COL9A3/COL9A1/COL11A2/COL25A1/COL23A1
WP_CALCIUM_REGULATION_IN_THE_CARDIAC_CELL	WP_CALCIUM_REGULATION_IN_THE_CARDIAC_CELL	33	-0.42839	-2.44632	0.00358423	0.0395421	0.0318869	695	tags=70%, list=30%, signal=50%	CHRM3/ATP1B1/RGS17/GNG4/GNAO1/GNG8/RGS2/GNAZ/ADRB3/CACNA1C/CAMK2A/SLC8A1/ATP2B2/RYR3/ADCY5/RYR2/ITPR1/GJA8/CHRM2/CASQ1/CASQ2/PLN/ADRA1A
WP_MYOMETRIAL_RELAXATION_AND_CONTRACTION_PATHWAYS	WP_MYOMETRIAL_RELAXATION_AND_CONTRACTION_PATHWAYS	32	-0.2628	-1.49953	0.0726644	0.253584	0.20449	628	tags=56%, list=27%, signal=42%	RGS17/GNG4/GNG8/RGS2/CALD1/CAMK2A/SLC8A1/PDE4D/RYR3/RXFP1/ACTC1/ACTA2/ADCY5/RYR2/ITPR1/CNN1/RAMP1/ACTA1
REACTOME_SIGNALING_BY_RHO_GTPASES	REACTOME_SIGNALING_BY_RHO_GTPASES	29	-0.344842	-1.90746	0.00701754	0.0615385	0.0496247	894	tags=72%, list=39%, signal=45%	ARHGDIG/NUP107/NCF4/RHOV/ARHGEF16/MCF2/ARHGEF37/KALRN/PPP1R12A/VAV3/PAK3/ARHGAP36/FLNA/CYFIP2/AR/MYL9/PPP1R14A/ROPN1/MYLK/PPP1R12B/MYH11
WP_BREAST_CANCER_PATHWAY	WP_BREAST_CANCER_PATHWAY	28	0.419089	1.86209	0.00995733	0.0694981	0.0560434	566	tags=54%, list=24%, signal=41%	FGF3/FGF19/FZD10/WNT4/FGF8/FGF9/HES5/WNT10B/WNT1/WNT3A/WNT11/WNT2B/FZD9/WNT2/WNT6
REACTOME_STIMULI_SENSING_CHANNELS	REACTOME_STIMULI_SENSING_CHANNELS	27	-0.302954	-1.61226	0.037415	0.184506	0.148786	212	tags=26%, list=9%, signal=24%	ANO3/RYR2/SLC9C2/ANO5/CASQ1/CASQ2/TRDN
WP_EPITHELIAL_TO_MESENCHYMAL_TRANSITION_IN_COLORECTAL_CANCER	WP_EPITHELIAL_TO_MESENCHYMAL_TRANSITION_IN_COLORECTAL_CANCER	26	0.448567	1.9394	0.00572246	0.0528941	0.0426539	566	tags=54%, list=24%, signal=41%	DLK1/FZD10/WNT4/CLDN19/CLDN1/WNT10B/WNT1/WNT3A/WNT11/WNT2B/FZD9/WNT2/PKP2/WNT6
WP_ESC_PLURIPOTENCY_PATHWAYS	WP_ESC_PLURIPOTENCY_PATHWAYS	26	0.406133	1.75593	0.0128755	0.0863418	0.0696262	566	tags=50%, list=24%, signal=38%	FGF3/FGF19/WNT4/FGF8/FGF9/WNT10B/WNT1/WNT3A/WNT11/WNT2B/FZD9/WNT2/WNT6
WP_OSTEOBLAST_DIFFERENTIATION	WP_OSTEOBLAST_DIFFERENTIATION	25	0.489387	2.08335	0.00144718	0.0231331	0.0186546	566	tags=60%, list=24%, signal=46%	FGF3/FZD10/WNT4/FGF8/FGF9/MYOD1/WNT10B/WNT1/WNT3A/WNT11/WNT2B/FZD9/HES2/WNT2/WNT6
WP_WNT_SIGNALING	WP_WNT_SIGNALING	25	0.54508	2.32044	0.00144718	0.0231331	0.0186546	739	tags=76%, list=32%, signal=52%	SFRP5/FZD10/WIF1/WNT4/DKK1/SOST/NOTUM/WNT10B/WNT1/WNT3A/NKD2/WNT11/WNT2B/FZD9/WNT2/WNT6/DKK2/SFRP2/CCND2
WP_ENDODERM_DIFFERENTIATION	WP_ENDODERM_DIFFERENTIATION	25	0.3698	1.57426	0.0390738	0.187683	0.151348	751	tags=56%, list=32%, signal=38%	ZIC3/TRIM71/BMP7/GATA4/TOX3/DKK1/FOXA2/OTX2/SOX21/PAX3/PRDM14/PLCH1/ZIC5/SOX2
KEGG_WNT_SIGNALING_PATHWAY	KEGG_WNT_SIGNALING_PATHWAY	24	0.50718	2.12825	0.00147275	0.0231331	0.0186546	739	tags=71%, list=32%, signal=49%	SFRP5/FZD10/WIF1/WNT4/DKK1/WNT10B/WNT1/WNT3A/NKD2/WNT11/WNT2B/FZD9/WNT2/WNT6/DKK2/SFRP2/CCND2
WP_LNCRNA_INVOLVEMENT_IN_CANONICAL_WNT_SIGNALING_AND_COLORECTAL_CANCER	WP_LNCRNA_INVOLVEMENT_IN_CANONICAL_WNT_SIGNALING_AND_COLORECTAL_CANCER	24	0.575386	2.41446	0.00147275	0.0231331	0.0186546	739	tags=79%, list=32%, signal=55%	SFRP5/FZD10/WIF1/WNT4/DKK1/SOST/NOTUM/WNT10B/WNT1/WNT3A/NKD2/WNT11/WNT2B/FZD9/WNT2/WNT6/DKK2/SFRP2/CCND2
WP_NCRNAS_INVOLVED_IN_WNT_SIGNALING_IN_HEPATOCELLULAR_CARCINOMA	WP_NCRNAS_INVOLVED_IN_WNT_SIGNALING_IN_HEPATOCELLULAR_CARCINOMA	24	0.572003	2.40026	0.00147275	0.0231331	0.0186546	739	tags=79%, list=32%, signal=55%	SFRP5/FZD10/WIF1/WNT4/DKK1/SOST/NOTUM/WNT10B/WNT1/WNT3A/NKD2/WNT11/WNT2B/FZD9/WNT2/WNT6/DKK2/SFRP2/CCND2
REACTOME_COLLAGEN_FORMATION	REACTOME_COLLAGEN_FORMATION	24	0.438046	1.83814	0.00883652	0.0667578	0.0538336	208	tags=29%, list=9%, signal=27%	COL26A1/COL2A1/COL9A3/COL9A1/COL11A2/COL25A1/COL23A1
WP_SPINAL_CORD_INJURY	WP_SPINAL_CORD_INJURY	23	0.539128	2.22535	0.00149254	0.0231331	0.0186546	512	tags=61%, list=22%, signal=48%	COL2A1/PRB1/MAG/PLA2G2A/PTPRZ1/NOS1/PDYN/GAP43/CXCL1/NGFR/CXCL8/NCAN/SLIT1/KLK8
REACTOME_REGULATION_OF_INSULIN_LIKE_GROWTH_FACTOR_IGF_TRANSPORT_AND_UPTAKE_BY_INSULIN_LIKE_GROWTH_FACTOR_BINDING_PROTEINS_IGFBPS_	REACTOME_REGULATION_OF_INSULIN_LIKE_GROWTH_FACTOR_IGF_TRANSPORT_AND_UPTAKE_BY_INSULIN_LIKE_GROWTH_FACTOR_BINDING_PROTEINS_IGFBPS_	23	0.357441	1.47541	0.0671642	0.246991	0.199174	968	tags=70%, list=42%, signal=41%	NOTUM/BPIFB2/MATN3/SCG3/HRC/IGFBP2/C3/ALB/IGFBP6/KLK13/BMP4/IGF2/GPC3/SERPIND1/MSLN/FBN1
KEGG_DILATED_CARDIOMYOPATHY	KEGG_DILATED_CARDIOMYOPATHY	22	-0.461879	-2.28541	0.00311526	0.0367386	0.0296261	448	tags=64%, list=19%, signal=52%	CACNA1C/CACNB2/SLC8A1/SGCA/ITGA7/DMD/TPM1/ACTC1/TPM2/DES/ADCY5/RYR2/PLN/ITGA8
KEGG_VASCULAR_SMOOTH_MUSCLE_CONTRACTION	KEGG_VASCULAR_SMOOTH_MUSCLE_CONTRACTION	22	-0.590944	-2.92403	0.00311526	0.0367386	0.0296261	483	tags=77%, list=21%, signal=62%	CALD1/PLCB4/CACNA1C/KCNMA1/MYL9/PPP1R14A/ACTA2/ADCY5/ITPR1/PLA2G10/ACTG2/RAMP1/KCNMB1/MYLK/PPP1R12B/MYH11/ADRA1A
REACTOME_ANTIMICROBIAL_PEPTIDES	REACTOME_ANTIMICROBIAL_PEPTIDES	21	0.481475	1.9501	0.00148148	0.0231331	0.0186546	694	tags=67%, list=30%, signal=47%	DEFB1/BPIFB1/BPIFB4/PI3/PLA2G2A/REG3G/BPIFA2/BPIFB2/ELANE/CHGA/LCN2/ART1/CAMP/PRTN3
KEGG_HYPERTROPHIC_CARDIOMYOPATHY_HCM	KEGG_HYPERTROPHIC_CARDIOMYOPATHY_HCM	21	-0.431699	-2.06349	0.00917431	0.0667578	0.0538336	448	tags=62%, list=19%, signal=50%	CACNA1C/CACNB2/SLC8A1/SGCA/ITGA7/DMD/TPM1/ACTC1/PRKAA2/TPM2/DES/RYR2/ITGA8
REACTOME_CLASS_I_MHC_MEDIATED_ANTIGEN_PROCESSING_PRESENTATION	REACTOME_CLASS_I_MHC_MEDIATED_ANTIGEN_PROCESSING_PRESENTATION	21	-0.425217	-2.03251	0.00917431	0.0667578	0.0538336	268	tags=38%, list=12%, signal=34%	CTSV/ASB5/FBXO32/KBTBD13/FBXL22/ASB2/FBXO40/TRIM63
WP_CARDIAC_PROGENITOR_DIFFERENTIATION	WP_CARDIAC_PROGENITOR_DIFFERENTIATION	20	0.523163	2.08769	0.00149477	0.0231331	0.0186546	303	tags=45%, list=13%, signal=39%	SOX1/IRX4/TBXT/LIN28B/TNNI3/GATA4/DKK1/TBX20/FOXA2
WP_HAIR_FOLLICLE_DEVELOPMENT_CYTODIFFERENTIATION_PART_3_OF_3	WP_HAIR_FOLLICLE_DEVELOPMENT_CYTODIFFERENTIATION_PART_3_OF_3	20	0.575209	2.29538	0.00149477	0.0231331	0.0186546	858	tags=90%, list=37%, signal=57%	WIF1/LGR5/KLK6/SOSTDC1/DKK1/DLX3/ELANE/KRT15/MSX2/DSG1/KLK13/KRT19/GJB6/ADAMTS20/FOXE1/SOX2/BMP4/BMP6
REACTOME_TCF_DEPENDENT_SIGNALING_IN_RESPONSE_TO_WNT	REACTOME_TCF_DEPENDENT_SIGNALING_IN_RESPONSE_TO_WNT	20	0.433392	1.72945	0.0179372	0.113602	0.0916092	453	tags=45%, list=20%, signal=37%	WIF1/WNT4/LGR5/TERT/RSPO4/DKK1/SOST/WNT1/WNT3A
REACTOME_ECM_PROTEOGLYCANS	REACTOME_ECM_PROTEOGLYCANS	20	0.423596	1.69037	0.0224215	0.125788	0.101436	542	tags=50%, list=23%, signal=39%	COL2A1/COL9A3/COL9A1/MATN4/COMP/TNXB/MATN3/NCAN/COL6A6/LAMA2
REACTOME_COLLAGEN_BIOSYNTHESIS_AND_MODIFYING_ENZYMES	REACTOME_COLLAGEN_BIOSYNTHESIS_AND_MODIFYING_ENZYMES	19	0.532967	2.08712	0.00151286	0.0231331	0.0186546	208	tags=37%, list=9%, signal=34%	COL26A1/COL2A1/COL9A3/COL9A1/COL11A2/COL25A1/COL23A1
REACTOME_RHO_GTPASE_EFFECTORS	REACTOME_RHO_GTPASE_EFFECTORS	19	-0.460223	-2.11692	0.00293255	0.0367386	0.0296261	378	tags=53%, list=16%, signal=44%	PAK3/FLNA/CYFIP2/AR/MYL9/PPP1R14A/ROPN1/MYLK/PPP1R12B/MYH11
KEGG_ARRHYTHMOGENIC_RIGHT_VENTRICULAR_CARDIOMYOPATHY_ARVC	KEGG_ARRHYTHMOGENIC_RIGHT_VENTRICULAR_CARDIOMYOPATHY_ARVC	19	-0.357495	-1.6444	0.0439883	0.193832	0.156307	475	tags=58%, list=20%, signal=46%	ACTN1/CACNA1C/CACNB2/SLC8A1/SGCA/ITGA7/DMD/CTNNA3/DES/RYR2/ITGA8
WP_ARRHYTHMOGENIC_RIGHT_VENTRICULAR_CARDIOMYOPATHY	WP_ARRHYTHMOGENIC_RIGHT_VENTRICULAR_CARDIOMYOPATHY	19	-0.357495	-1.6444	0.0439883	0.193832	0.156307	475	tags=58%, list=20%, signal=46%	ACTN1/CACNA1C/CACNB2/SLC8A1/SGCA/ITGA7/DMD/CTNNA3/DES/RYR2/ITGA8
REACTOME_COLLAGEN_DEGRADATION	REACTOME_COLLAGEN_DEGRADATION	18	0.536118	2.05458	0.00151057	0.0231331	0.0186546	208	tags=39%, list=9%, signal=36%	COL26A1/COL2A1/COL9A3/COL9A1/COL11A2/COL25A1/COL23A1
WP_G_PROTEIN_SIGNALING_PATHWAYS	WP_G_PROTEIN_SIGNALING_PATHWAYS	18	-0.529921	-2.36379	0.00294118	0.0367386	0.0296261	704	tags=83%, list=30%, signal=59%	GNAL/PALM2AKAP2/PDE8B/GNG4/PDE1C/GNAO1/GNG8/GNAZ/AKAP1/AKAP6/PDE4D/AKAP5/ADCY5/ITPR1/AKAP4
REACTOME_ION_HOMEOSTASIS	REACTOME_ION_HOMEOSTASIS	18	-0.483133	-2.15509	0.00588235	0.0529412	0.0426919	440	tags=83%, list=19%, signal=68%	ATP2B4/DMPK/ATP1B1/ABCC9/CAMK2A/SLC8A1/ATP2B2/RYR3/ATP2A1/RYR2/ITPR1/CASQ1/CASQ2/PLN/TRDN
WP_OXIDATION_BY_CYTOCHROME_P450	WP_OXIDATION_BY_CYTOCHROME_P450	18	0.422049	1.61743	0.0377644	0.184506	0.148786	849	tags=67%, list=37%, signal=43%	CYP2W1/CYP2C18/CYP2C9/CYP26A1/CYP27B1/CYP11A1/CYP1A2/CYP4F2/CYP4B1/CYP4Z1/CYP8B1/CYP26B1
REACTOME_NCAM_SIGNALING_FOR_NEURITE_OUT_GROWTH	REACTOME_NCAM_SIGNALING_FOR_NEURITE_OUT_GROWTH	18	0.406371	1.55735	0.0558912	0.222265	0.179235	524	tags=44%, list=23%, signal=35%	COL2A1/COL9A3/COL9A1/CACNA1I/CNTN2/NCAN/COL6A6/GFRA2
REACTOME_SIGNALING_BY_FGFR	REACTOME_SIGNALING_BY_FGFR	18	0.404677	1.55086	0.0558912	0.222265	0.179235	1092	tags=78%, list=47%, signal=42%	FGF3/FGF19/FGF8/FGF9/FGFBP1/FGF20/FGFR3/FGFBP2/FRS2/SPRY2/FLRT1/FGF18/FGF16/FLRT3
KEGG_HEDGEHOG_SIGNALING_PATHWAY	KEGG_HEDGEHOG_SIGNALING_PATHWAY	17	0.592316	2.23719	0.00152439	0.0231331	0.0186546	566	tags=71%, list=24%, signal=54%	SHH/BMP5/WNT4/BMP7/BMP8B/WNT10B/WNT1/WNT3A/WNT11/WNT2B/WNT2/WNT6
KEGG_MELANOGENESIS	KEGG_MELANOGENESIS	17	0.428551	1.61865	0.0411585	0.187683	0.151348	566	tags=59%, list=24%, signal=45%	FZD10/WNT4/WNT10B/WNT1/WNT3A/WNT11/WNT2B/FZD9/WNT2/WNT6
WP_THYROID_HORMONES_PRODUCTION_AND_THEIR_PERIPHERAL_DOWNSTREAM_SIGNALLING_EFFECTS	WP_THYROID_HORMONES_PRODUCTION_AND_THEIR_PERIPHERAL_DOWNSTREAM_SIGNALLING_EFFECTS	17	0.424733	1.60423	0.0442073	0.193832	0.156307	135	tags=29%, list=6%, signal=28%	SHH/TRH/MAFA/WNT4/DUOXA2
REACTOME_CONSTITUTIVE_SIGNALING_BY_ABERRANT_PI3K_IN_CANCER	REACTOME_CONSTITUTIVE_SIGNALING_BY_ABERRANT_PI3K_IN_CANCER	17	0.39567	1.49446	0.0807927	0.270893	0.218449	205	tags=29%, list=9%, signal=27%	FGF3/FGF19/FGF8/ERBB3/FGF9
WP_WNT_SIGNALING_PATHWAY_AND_PLURIPOTENCY	WP_WNT_SIGNALING_PATHWAY_AND_PLURIPOTENCY	16	0.559401	2.08116	0.00152439	0.0231331	0.0186546	751	tags=81%, list=32%, signal=55%	FZD10/WNT4/WNT10B/WNT1/WNT3A/NKD2/WNT11/WNT2B/FZD9/WNT2/WNT6/CCND2/SOX2
KEGG_INSULIN_SIGNALING_PATHWAY	KEGG_INSULIN_SIGNALING_PATHWAY	16	-0.464652	-1.94978	0.00867052	0.0667578	0.0538336	574	tags=69%, list=25%, signal=52%	PHKA1/PTPRF/PYGM/MAPK10/PPP1R3B/SOCS2/PPP1R3C/PRKAA2/PHKG1/PPARGC1A/SORBS1
REACTOME_ANTIGEN_PROCESSING_UBIQUITINATION_PROTEASOME_DEGRADATION	REACTOME_ANTIGEN_PROCESSING_UBIQUITINATION_PROTEASOME_DEGRADATION	16	-0.501881	-2.106	0.00867052	0.0667578	0.0538336	214	tags=44%, list=9%, signal=40%	ASB5/FBXO32/KBTBD13/FBXL22/ASB2/FBXO40/TRIM63
REACTOME_COMPLEMENT_CASCADE	REACTOME_COMPLEMENT_CASCADE	16	0.464265	1.72722	0.0243902	0.132404	0.106771	668	tags=62%, list=29%, signal=45%	C4BPB/CR2/CFD/C4BPA/ELANE/COLEC11/C9/C3/FCN2/CR1
REACTOME_NCAM1_INTERACTIONS	REACTOME_NCAM1_INTERACTIONS	16	0.454435	1.69065	0.0335366	0.168669	0.136015	524	tags=50%, list=23%, signal=39%	COL2A1/COL9A3/COL9A1/CACNA1I/CNTN2/NCAN/COL6A6/GFRA2
REACTOME_INTEGRIN_CELL_SURFACE_INTERACTIONS	REACTOME_INTEGRIN_CELL_SURFACE_INTERACTIONS	16	0.429126	1.59649	0.0503049	0.212398	0.171278	208	tags=31%, list=9%, signal=29%	COL2A1/COL9A3/COL9A1/COMP/COL23A1
NABA_COLLAGENS	NABA_COLLAGENS	15	0.621801	2.25262	0.00156006	0.0231331	0.0186546	208	tags=47%, list=9%, signal=43%	COL26A1/COL2A1/COL9A3/COL9A1/COL11A2/COL25A1/COL23A1
REACTOME_COLLAGEN_CHAIN_TRIMERIZATION	REACTOME_COLLAGEN_CHAIN_TRIMERIZATION	15	0.621801	2.25262	0.00156006	0.0231331	0.0186546	208	tags=47%, list=9%, signal=43%	COL26A1/COL2A1/COL9A3/COL9A1/COL11A2/COL25A1/COL23A1
WNT_SIGNALING	WNT_SIGNALING	15	0.556119	2.01467	0.00156006	0.0231331	0.0186546	566	tags=67%, list=24%, signal=51%	TBXT/WIF1/WNT4/DKK1/WNT1/WNT3A/WNT11/WNT2B/WNT2/WNT6
WP_STRIATED_MUSCLE_CONTRACTION_PATHWAY	WP_STRIATED_MUSCLE_CONTRACTION_PATHWAY	15	-0.54073	-2.22311	0.00831025	0.0667578	0.0538336	422	tags=67%, list=18%, signal=55%	MYOM1/DMD/TPM1/ACTC1/TPM2/DES/MYL9/ACTA2/TMOD1/ACTA1
REACTOME_ASSEMBLY_OF_COLLAGEN_FIBRILS_AND_OTHER_MULTIMERIC_STRUCTURES	REACTOME_ASSEMBLY_OF_COLLAGEN_FIBRILS_AND_OTHER_MULTIMERIC_STRUCTURES	15	0.479101	1.73565	0.0265211	0.139542	0.112527	61	tags=27%, list=3%, signal=26%	COL2A1/COL9A3/COL9A1/COL11A2
WP_PREIMPLANTATION_EMBRYO	WP_PREIMPLANTATION_EMBRYO	15	0.411384	1.49033	0.074883	0.258687	0.208605	957	tags=73%, list=41%, signal=43%	DLX2/SIX3/BARX2/SOX8/CDX2/AQP3/SOX11/SOX2/TFAP2B/ZFP42/DPRX
WP_FRAGILE_X_SYNDROME	WP_FRAGILE_X_SYNDROME	15	-0.345561	-1.42071	0.0803324	0.270893	0.218449	440	tags=47%, list=19%, signal=38%	CAMK2A/AKAP5/CYFIP2/GRM1/ITPR1/GRIA2/GRIN2A
KEGG_MELANOMA	KEGG_MELANOMA	15	0.403049	1.46014	0.0842434	0.277031	0.223398	205	tags=27%, list=9%, signal=24%	FGF3/FGF19/FGF8/FGF9
KEGG_BASAL_CELL_CARCINOMA	KEGG_BASAL_CELL_CARCINOMA	14	0.636638	2.25773	0.00157729	0.0231331	0.0186546	566	tags=79%, list=24%, signal=60%	SHH/FZD10/WNT4/WNT10B/WNT1/WNT3A/WNT11/WNT2B/FZD9/WNT2/WNT6
WP_DOPAMINERGIC_NEUROGENESIS	WP_DOPAMINERGIC_NEUROGENESIS	14	0.598058	2.12091	0.00157729	0.0231331	0.0186546	527	tags=71%, list=23%, signal=56%	SHH/EN2/FGF8/LMX1B/FOXA2/WNT1/OTX2/GBX2/PITX3/SLC6A3
REACTOME_NEDDYLATION	REACTOME_NEDDYLATION	14	-0.495506	-1.97741	0.00815217	0.0667578	0.0538336	214	tags=71%, list=9%, signal=65%	ASB11/KLHL13/ASB16/SOCS2/ASB5/FBXO32/KBTBD13/FBXL22/ASB2/FBXO40
REACTOME_CHEMOKINE_RECEPTORS_BIND_CHEMOKINES	REACTOME_CHEMOKINE_RECEPTORS_BIND_CHEMOKINES	14	0.443433	1.57256	0.0410095	0.187683	0.151348	1298	tags=100%, list=56%, signal=44%	CXCL6/CXCL1/CXCL8/CCL20/CCL22/CCL25/CCL11/CXCR1/CXCL5/ACKR2/CCL21/ACKR3/CXCR2/CCL17
WP_DIFFERENTIATION_PATHWAY	WP_DIFFERENTIATION_PATHWAY	14	0.443513	1.57285	0.0410095	0.187683	0.151348	828	tags=71%, list=36%, signal=46%	SHH/FGF8/DKK1/WNT1/WNT3A/WNT2B/WNT2/NTF4/TPO/BMP4
WP_DNA_DAMAGE_RESPONSE_ONLY_ATM_DEPENDENT	WP_DNA_DAMAGE_RESPONSE_ONLY_ATM_DEPENDENT	14	0.438495	1.55505	0.0488959	0.20903	0.168562	566	tags=57%, list=24%, signal=43%	WNT4/WNT10B/WNT1/WNT3A/WNT11/WNT2B/WNT2/WNT6
REACTOME_POST_TRANSLATIONAL_MODIFICATION_SYNTHESIS_OF_GPI_ANCHORED_PROTEINS	REACTOME_POST_TRANSLATIONAL_MODIFICATION_SYNTHESIS_OF_GPI_ANCHORED_PROTEINS	14	0.433467	1.53722	0.0536278	0.218342	0.176071	1088	tags=86%, list=47%, signal=46%	PRSS21/ALPL/RAET1L/LYPD6B/NTNG2/LYPD2/RTN4RL1/XPNPEP2/MSLN/LYPD1/VNN3/PRND
WP_HEART_DEVELOPMENT	WP_HEART_DEVELOPMENT	13	0.641788	2.2171	0.00158983	0.0231331	0.0186546	327	tags=62%, list=14%, signal=53%	SHH/IRX4/FGF8/ERBB3/GATA4/TBX20/FOXA2/TBX1
KEGG_LONG_TERM_POTENTIATION	KEGG_LONG_TERM_POTENTIATION	13	-0.454148	-1.76979	0.0187668	0.113976	0.0919101	463	tags=62%, list=20%, signal=50%	PLCB4/CACNA1C/CAMK2A/GRM1/ITPR1/GRIA2/PPP1R1A/GRIN2A
REACTOME_SUMOYLATION	REACTOME_SUMOYLATION	13	-0.430778	-1.67872	0.0241287	0.132404	0.106771	243	tags=38%, list=10%, signal=35%	AR/PPARGC1A/NR1H4/ESR1/PGR
REACTOME_TRANSPORT_TO_THE_GOLGI_AND_SUBSEQUENT_MODIFICATION	REACTOME_TRANSPORT_TO_THE_GOLGI_AND_SUBSEQUENT_MODIFICATION	13	0.47012	1.62406	0.0397456	0.187683	0.151348	760	tags=69%, list=33%, signal=47%	CHST8/TUBB4A/MGAT4C/TGFA/TUBA3C/ST8SIA3/GRIA1/MGAT3/TUBAL3
REACTOME_SIGNALING_BY_TYPE_1_INSULIN_LIKE_GROWTH_FACTOR_1_RECEPTOR_IGF1R_	REACTOME_SIGNALING_BY_TYPE_1_INSULIN_LIKE_GROWTH_FACTOR_1_RECEPTOR_IGF1R_	13	0.464249	1.60378	0.0461049	0.199593	0.160953	1061	tags=85%, list=46%, signal=46%	FGF3/FGF19/FGF8/FGF9/FGF20/FGFR3/IGF2/CILP/FRS2/FGF18/FGF16
WP_GENES_CONTROLLING_RENAL_NEPHROGENESIS	WP_GENES_CONTROLLING_RENAL_NEPHROGENESIS	13	0.436422	1.50765	0.0683625	0.247643	0.1997	253	tags=38%, list=11%, signal=34%	PAX2/WNT4/FGF8/TCF21/LMX1B
REACTOME_SMOOTH_MUSCLE_CONTRACTION	REACTOME_SMOOTH_MUSCLE_CONTRACTION	12	-0.698425	-2.65956	0.00265957	0.036383	0.0293393	319	tags=75%, list=14%, signal=65%	TPM1/TPM2/MYL9/ACTA2/SORBS1/ACTG2/MYLK/LMOD1/MYH11
REACTOME_STRIATED_MUSCLE_CONTRACTION	REACTOME_STRIATED_MUSCLE_CONTRACTION	12	-0.508475	-1.93624	0.0132979	0.0874591	0.0705272	341	tags=58%, list=15%, signal=50%	DMD/TPM1/ACTC1/TPM2/DES/TMOD1/ACTA1
REACTOME_O_LINKED_GLYCOSYLATION_OF_MUCINS	REACTOME_O_LINKED_GLYCOSYLATION_OF_MUCINS	12	0.499865	1.68913	0.0271565	0.14072	0.113477	432	tags=50%, list=19%, signal=41%	MUC6/GALNT9/MUCL1/MUC5AC/GALNT14/B3GNT3
REACTOME_SIGNALING_BY_INSULIN_RECEPTOR	REACTOME_SIGNALING_BY_INSULIN_RECEPTOR	12	0.495544	1.67453	0.0303514	0.154928	0.124934	205	tags=33%, list=9%, signal=31%	FGF3/FGF19/FGF8/FGF9
WP_PRADERWILLI_AND_ANGELMAN_SYNDROME	WP_PRADERWILLI_AND_ANGELMAN_SYNDROME	12	0.457764	1.54686	0.057508	0.223497	0.180228	1039	tags=83%, list=45%, signal=46%	OCA2/MAGEL2/OXT/KISS1/GABRA5/CCND2/CDK4/GABRG3/GABRB3/MDM2
REACTOME_SIGNALING_BY_FGFR2	REACTOME_SIGNALING_BY_FGFR2	12	0.452477	1.529	0.0623003	0.239401	0.193054	1061	tags=83%, list=46%, signal=45%	FGF3/FGF8/FGF9/FGFBP1/FGF20/FGFBP2/FRS2/SPRY2/FGF18/FGF16
PID_HNF3A_PATHWAY	PID_HNF3A_PATHWAY	12	0.440306	1.48787	0.0830671	0.275815	0.222418	307	tags=50%, list=13%, signal=44%	SHH/CYP2C18/C4BPB/TFF1/FOXA2/GCG
WP_OLIGODENDROCYTE_SPECIFICATION_AND_DIFFERENTIATION_LEADING_TO_MYELIN_COMPONENTS_FOR_CNS	WP_OLIGODENDROCYTE_SPECIFICATION_AND_DIFFERENTIATION_LEADING_TO_MYELIN_COMPONENTS_FOR_CNS	12	0.437526	1.47848	0.086262	0.280968	0.226573	241	tags=33%, list=10%, signal=30%	SHH/MAG/SOX8/CXCL1
WP_ALZHEIMERS_DISEASE	WP_ALZHEIMERS_DISEASE	12	-0.370598	-1.41121	0.0904255	0.289024	0.233069	463	tags=58%, list=20%, signal=47%	PLCB4/CACNA1C/RYR3/MAPT/ATP2A1/ITPR1/GRIN2A
WP_WNT_SIGNALING_IN_KIDNEY_DISEASE	WP_WNT_SIGNALING_IN_KIDNEY_DISEASE	11	0.64222	2.11504	0.00160256	0.0231331	0.0186546	566	tags=82%, list=24%, signal=62%	WNT4/WNT10B/WNT1/WNT3A/WNT11/WNT2B/FZD9/WNT2/WNT6
WP_INTEGRINMEDIATED_CELL_ADHESION	WP_INTEGRINMEDIATED_CELL_ADHESION	11	-0.618901	-2.27845	0.00529101	0.0517007	0.0416915	680	tags=91%, list=29%, signal=65%	ILK/VAV3/MAPK10/TNS1/CAPN6/PAK3/ITGA7/MAPK4/SORBS1/ITGA8
REACTOME_INSULIN_RECEPTOR_SIGNALLING_CASCADE	REACTOME_INSULIN_RECEPTOR_SIGNALLING_CASCADE	11	0.527584	1.73751	0.0224359	0.125788	0.101436	205	tags=36%, list=9%, signal=33%	FGF3/FGF19/FGF8/FGF9
REACTOME_IRS_MEDIATED_SIGNALLING	REACTOME_IRS_MEDIATED_SIGNALLING	11	0.527584	1.73751	0.0224359	0.125788	0.101436	205	tags=36%, list=9%, signal=33%	FGF3/FGF19/FGF8/FGF9
REACTOME_AMINE_LIGAND_BINDING_RECEPTORS	REACTOME_AMINE_LIGAND_BINDING_RECEPTORS	11	-0.474726	-1.74768	0.026455	0.139542	0.112527	465	tags=64%, list=20%, signal=51%	ADRB3/DRD2/HTR4/GPR143/HTR1B/CHRM2/ADRA1A
WP_PATHWAYS_REGULATING_HIPPO_SIGNALING	WP_PATHWAYS_REGULATING_HIPPO_SIGNALING	11	0.483079	1.59094	0.0512821	0.213884	0.172476	323	tags=45%, list=14%, signal=39%	CDH19/CDH22/CDH9/NGFR/CDH10
REACTOME_G_ALPHA_12_13_SIGNALLING_EVENTS	REACTOME_G_ALPHA_12_13_SIGNALLING_EVENTS	11	-0.416912	-1.53483	0.0634921	0.24127	0.19456	828	tags=82%, list=36%, signal=53%	ARHGEF16/GNGT2/MCF2/ARHGEF37/KALRN/GNG4/VAV3/GNG8/ADRA1A
PID_AVB3_INTEGRIN_PATHWAY	PID_AVB3_INTEGRIN_PATHWAY	10	0.652997	2.07722	0.00162338	0.0231331	0.0186546	61	tags=40%, list=3%, signal=39%	COL2A1/COL9A3/COL9A1/COL11A2
WP_COMMON_PATHWAYS_UNDERLYING_DRUG_ADDICTION	WP_COMMON_PATHWAYS_UNDERLYING_DRUG_ADDICTION	10	-0.568843	-2.02757	0.0103627	0.0708808	0.0571584	440	tags=70%, list=19%, signal=57%	CAMK2A/DRD2/GRM1/GRIA2/PPP1R1A/ACTG2/GRIN2A
WP_INSULIN_SIGNALING	WP_INSULIN_SIGNALING	10	-0.442684	-1.57789	0.0647668	0.243409	0.196286	648	tags=80%, list=28%, signal=58%	RPS6KA5/PTPRF/MAPK10/RRAD/SNAP25/PRKAA2/MAPK4/SORBS1
REACTOME_RHO_GTPASE_CYCLE	REACTOME_RHO_GTPASE_CYCLE	10	-0.431848	-1.53927	0.0699482	0.24919	0.200948	1324	tags=100%, list=57%, signal=43%	ARHGAP8/ARHGDIG/RHOV/ARHGEF16/MCF2/ARHGEF37/KALRN/VAV3/ARHGAP36
